# Supplementary material
Source: Springer Nature journal article supplement (https://www.springermedizin.de/resource/supplementary/12889_2010_2418_MOESM1_ESM.pdf/9485754)
Supplement: MOESM1 [file 9485754]

# Interpretation of Disease [Score 0-4]

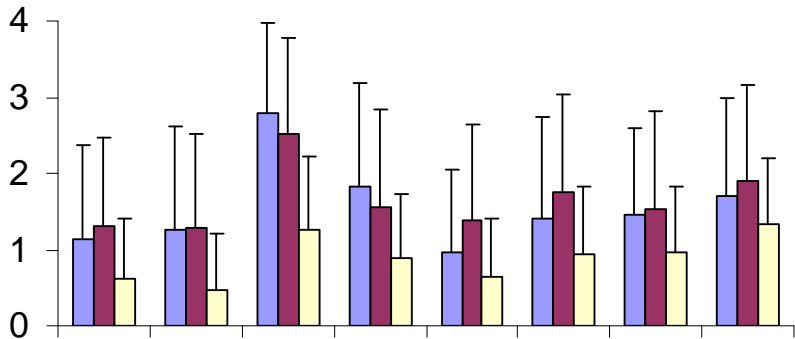

■ Pain Outpatient Clinic

■ Rehabilitation Clinics

■ Mind-Body Training Programs
